1     **The estrogenic pathway modulates non-breeding female aggression**  
2                                   **in a teleost fish**

3

4                   Lucía Zubizarreta <sup>1,2</sup>, Ana C. Silva<sup>2,3</sup>, \*Laura Quintana<sup>2</sup>

5     **1** Laboratorio de Neurofisiología Celular y Sináptica, Departamento de Fisiología, Facultad de  
6     Medicina, Universidad de la República, Avenida Gral. Flores 2125, Montevideo, Uruguay.

7

8     **2** Unidad Bases Neurales de la Conducta, Departamento de Neurofisiología Celular y Molecular,  
9     Instituto de Investigaciones Biológicas Clemente Estable, Avenida Italia 3318, Montevideo,  
10    Uruguay

11

12    **3** Laboratorio de Neurociencias, Facultad de Ciencias, Universidad de la República, Iguá 4225,  
13    11400 Montevideo, Uruguay.

14

15    \* Corresponding Author: [lquintana@iibce.edu.uy](mailto:lquintana@iibce.edu.uy)

16

17    **Abstract**

18    Aggressive behaviors are widespread among animals and are critical in the competition for  
19    resources. The physiological mechanisms underlying aggression have mostly been examined in  
20    breeding males, in which gonadal androgens, acting in part through their aromatization to  
21    estrogens, have a key role. There are two alternative models that contribute to further  
22    understanding hormonal mechanisms underlying aggression: aggression displayed in the non-  
23    breeding season, when gonadal steroids are low, and female aggression. In this study we  
24    approach, for the first time, the modulatory role of estrogens and androgens upon non-breeding  
25    aggression in a wild female teleost fish. We characterized female aggression in the weakly  
26    electric fish *Gymnotus omarorum* and carried out acute treatments 1 h prior to agonistic  
27    encounters with either an aromatase inhibitor or an antagonist of androgen receptors.  
28    Aromatase inhibition caused a strong distortion of aggressive behavior whereas anti-androgen  
29    treatment had no effect on behavior. Territorial non-breeding aggression in female *G. omarorum*

30 is robust and depended on rapid estrogen actions to maintain high levels of aggression, and  
31 ultimately reach conflict resolution from which dominant/subordinate status emerged. Our  
32 results taken together with our own reports in males and the contributions from non-breeding  
33 aggression in bird and mammal models, suggest a conserved strategy involving fast-acting  
34 estrogens in the control of this behavior across species. In addition, further analysis of female  
35 non-breeding aggression may shed light on potential sexual differences in the fine tuning of  
36 social behaviors.

37

## 38 **Keywords**

- 39 1. Territorial aggression
- 40 2. Cyproterone acetate
- 41 3. Fadrozole
- 42 4. Gymnotiformes

43

## 44 **Highlights**

- 45 ● Female *Gymnotus omarorum* displayed robust territorial aggression in lab settings.
- 46 ● Acute treatment with aromatase inhibitor lowered aggression levels.
- 47 ● Aromatase inhibition increased first attack latency and decreased conflict resolution.
- 48 ● Acute treatment with anti-androgens showed no effects.
- 49 ● This is the first report of estrogens underlying teleost non-breeding female aggression.

50

## 51 **Introduction**

52

53 Aggressive behaviors are widespread among animals, and they are key in the competition for  
54 resources such as food, shelter, and mating opportunities. Males are usually more aggressive  
55 than females, however robust female aggression is highly prevalent in many species, and not

56 only in the context of maternal aggression. In particular, territorial aggression has been shown  
57 to occur in female fish, reptiles, birds, rodents, and non-human primates [1].

58 The physiological mechanisms underlying aggression have been mostly examined in breeding  
59 males, in which the involvement of gonadal androgens has been widely established [2]. In the  
60 last 30 years the understanding of the modulation of this complex behavior by sexual hormones  
61 has greatly advanced: estrogens have been recognized as additional modulators of aggression  
62 and both androgens and estrogens have been shown to have slow and rapid behavioral effects,  
63 reflecting genomic and nongenomic mechanisms ([3]; revised in [4]).

64  
65 Researchers have incorporated two models which offer valuable opportunities to further  
66 understand the physiology of aggression: the very understudied female aggression, which is  
67 modulated by androgens and estrogens albeit frequently in ways distinct from males, and  
68 species in which aggression occurs uncoupled from the breeding season [5–13]. Female  
69 aggression has been shown to be promoted by testosterone and at least part of this effect is  
70 through its aromatization to estrogens [11]. Although estrogens may increase aggression in  
71 some species [9,10,14] their effects may differ and brain estrogen receptor subtypes have been  
72 shown to mediate opposing effects upon aggressive behavior [15,16]. Some species display  
73 aggression uncoupled from the breeding season, when their gonads are regressed and their  
74 circulating levels of gonadal androgens are reduced ([17]; revised in [13]). In the non-breeding  
75 season, estrogens have a forefront role in the regulation of aggression, mostly through rapid  
76 nongenomic mechanisms. Estradiol treatment has been shown to rapidly promote male non-  
77 breeding aggression in mammals and birds [18–23], and acute inhibition of aromatase, the  
78 enzyme which converts androgens into estrogens, decreases aggression levels [24]. In turn,  
79 aggressive interactions between males during the non-breeding season can produce changes  
80 of estradiol levels in specific brain areas [25]. In both males and females, non-breeding  
81 aggression is linked to modulations of brain estrogen receptors mediating rapid effects [18,26].

82 Androgens and estrogens can be synthesized locally in the brain either from extragonadal  
83 precursors [13,27–29] or *de novo* from cholesterol [30,31]. The study of non-breeding  
84 aggression of males and females has opened new avenues of understanding the complexity of  
85 the control of aggression and its overall modulation during natural seasonal cycles.

86

87 The weakly electric fish *Gymnotus omarorum* is a seasonal breeder, which displays year-long  
88 active territorial defense maintaining territories both in the natural habitat [32] and in the lab [33].  
89 The non-breeding territorial aggression of wild *G. omarorum* is robust, elicited in neutral arenas  
90 and triggered by the presence of a conspecific [34]. It displays strikingly aggressive encounters,  
91 in both intra and intersexual dyads, and males and females show no differences in contest  
92 outcome, temporal dynamics of the agonistic encounter, levels of aggression, nor submissive  
93 signaling [34,35]. Male aggression has been rigorously characterized; contest resolution is  
94 biased by body size and once dominant/subordinate status is established; the dominant fish  
95 displays a long-lasting exclusion of the subordinate fish from its territory [33]. Male non-breeding  
96 aggression is independent of gonadal hormones, as it occurs robustly in fish that have been  
97 gonadectomized a month prior. In addition, intact fish show circulating androgen (11-  
98 ketotestosterone) levels unaffected by aggressive encounters. However, aggression is  
99 dependent on rapid hormone effects, as the acute inhibition of aromatase distorts contest  
100 dynamics and outcome: aggression levels are reduced, and outcome becomes unpredictable  
101 [36]. Is fast estrogenic modulation a general strategy underlying non-breeding aggression in this  
102 species, independently of sex? This study approaches wild female non-breeding aggression  
103 and its control by estrogens and androgens to address this issue.

104

## 105 **Methods**

106

### 107 Animals

108 We used wild adult females of *Gymnotus omarorum* (Richer-de-Forges et al., 2009) (body-  
109 length 15 - 26 cm and body weight 9 – 60 g) captured from the field and housed for 4 to 5  
110 weeks in our facilities before experiments. All experiments were carried out during the non-  
111 breeding season (June to August) [37]. Fish were collected from Laguna del Sauce (34°51'S,  
112 55°07'W), Maldonado, Uruguay using an electrical detector as previously described [37].  
113 Animals were housed in individual mesh compartments (40x40x60 cm) within large outdoor  
114 tanks (500 L). These outdoor tanks house aquatic plants brought from the field and were  
115 subjected to conditions with natural photoperiod (from LD 10:14 to LD 11:13), temperature  
116 ( $10.41 \pm 3.48$  °C), and rainfall. To conserve conditions similar to the natural habitat, conductivity  
117 was maintained under 200  $\mu$ S/cm [37]. Each fish had a shelter in its compartment and was fed  
118 *ad libitum* with *Tubifex tubifex*. All experiments were performed according to the regulations for  
119 the use of animals in research and the experimental protocol was approved by the institutional  
120 Ethical Committee of Instituto de Investigaciones Biológicas Clemente Estable (Resolution  
121 CEUA IIBCE 004/05/2016).

122

### 123 Behavioral set up

124 We observed the agonistic behavior of *G. omarorum* in dyadic female-female encounters and  
125 tested the effect of aromatase inhibition or androgen receptor antagonism during the non-  
126 breeding season. The dyads (7-20% body weight difference between contenders) belonged to  
127 one of the following experimental groups: control dyads (n = 8), fadrozole-treated dyads (n =  
128 10), or cyproterone acetate-treated dyads (n = 7). We performed the characterization of female  
129 agonistic behavior in control dyads. The evaluation of agonistic behavior included engagement  
130 in conflict, contest outcome, dynamics, aggression, and submission levels, and these  
131 parameters were used in the comparison to fadrozole and cyproterone acetate dyads. All  
132 experimental groups were composed of fish spanning the same size range and each fish was  
133 used only once. Dyads were placed in a behavioral setup (as described in [38]) that allowed

134 simultaneous video and electric recordings, control of photoperiod, water temperature,  
135 conductivity, and pH. The setup consisted of 4 experimental tanks (55 × 40 × 25 cm) divided in  
136 half by a removable glass gate. Due to the nocturnal habits of this species, all experiments were  
137 performed at night, in darkness, with infrared LED illumination (Kingbright L- 53F3BT; 940 nm)  
138 located above the tanks. Experiments were recorded with an infrared-sensitive video camera  
139 (SONY CCDIris, Montevideo, Uruguay) through the glass bottom of the tank. The electric  
140 signals of freely moving fish were detected by two pairs of fixed copper wire electrodes  
141 connected to two high-input impedance (1 MΩ) amplifiers (FLA-01; Cygnus Technologies Inc.,  
142 Delaware Water Gap, PA, USA). Images and electric signals were captured by a video card  
143 (Pinnacle Systems, PCTV-HD pro stick) and stored in the computer for further analysis. We  
144 used a neutral arena protocol with a plain arena (without food or shelter) and simultaneously  
145 placed each contender in one of the equally sized compartments 2 h prior to the experiment  
146 thus providing equal resources (territory and residency) to each individual [34]. Pharmacological  
147 manipulations were performed 1 hour before gate removal (see below). The gate was raised 10  
148 min after sunset, and fish were separated 10 min after conflict resolution. Dyadic contests that  
149 did not reach an establishment of dominance/subordination after 20 minutes of interaction were  
150 interrupted and labeled as “dyads with engagement without resolution”. Dyadic interactions in  
151 which there was no engagement during 20 minutes after gate removal were interrupted and  
152 considered “dyads with no engagement”.

153

#### 154 Pharmacological manipulations

155 To analyze the rapid modulation of estrogens and androgens we used acute treatment with  
156 different inhibitors. Cyproterone acetate (CA) has been previously reported to effectively block  
157 AR in teleost fish [39,40]. Nevertheless, since it had never been used in *G. omarorum*, we  
158 confirmed the innocuity of its vehicle and the effectiveness of the inhibitor in this species. We  
159 performed an experiment blocking a well-known androgenic-dependent trait previously

160 described in non-breeding adults [41]. The electric organ discharge (EOD) of *G. omarorum* has  
161 a multiphasic waveform with four successive components (V1 to V4) [42]. A 15-day treatment  
162 with testosterone implants specifically increases the amplitude of the negative component V4  
163 which is quantified by the index V4 amplitude/V3 amplitude (AV4/AV3). The reports on the  
164 effects of supraphysiological testosterone on EOD waveform were based on mixed groups (non-  
165 breeding males and females [41]). We subcutaneously implanted 22 animals with testosterone  
166 silastic pellets (100 ug/gbw). A stock solution of CA (Sigma, C3412), 2 µg/µl was prepared in  
167 mineral oil (Drogueria Industrial Uruguaya), and stored at 4°C. Testosterone implanted animals  
168 were divided into a control group (n = 12) which received a daily IP injection of mineral oil for 15  
169 days, and the treatment group (n = 10) which received a daily IP injection of CA (20 µg/gbw) for  
170 15 days. EOD waveform was recorded following [43]. The testosterone + mineral oil group  
171 increased AV4/AV3 amplitude index when comparing day 15 to day 0, as expected (paired t-  
172 test, p = 0.006, n = 12, Fig. 1A), whereas the group treated with testosterone + cyproterone  
173 acetate showed no significant increase in its index (paired t-test, p = 0.8, n = 10, Fig. 1B). This  
174 result demonstrates cyproterone acetate effectively blocks androgenic actions in *G. omarorum*,  
175 as shown in other teleost species. To verify the innocuity of mineral oil in the species we  
176 compared 6 females injected with PBS to 6 injected with mineral oil (in equal volumes). Fish  
177 were recorded individually in the behavioral setup, locomotion was quantified in a 2 minute time  
178 window 1 hour after injections. Percentage of time in movement was compared between oil and  
179 PBS females, showing no significant difference (Mann-Whitney U test, p = 0.2, n<sub>OIL</sub> = 6, n<sub>PBS</sub>=  
180 6). Basal EOD rate was calculated for each fish 1 hour after injections (see below), and there  
181 was no significant difference between oil and PBS females (Mann-Whitney U test, p = 0.57, n<sub>OIL</sub>  
182 = 6, n<sub>PBS</sub>= 6).

183 To test the effect of acutely manipulating the androgenic pathway on agonistic behavior, we  
184 administered cyproterone acetate to female-female dyads before subjecting them to the neutral  
185 arena protocol. One hour before the agonistic encounter, we injected cyproterone acetate (10

186  $\mu\text{g/gbw}$ , IP) to both individuals, behavioral experiments were performed as described above. To  
187 ensure an effective blocking we used a higher dosis than previously reported for other teleost  
188 species [39].

189 To assess the effect of modulating the estrogenic pathway we used the aromatase inhibitor  
190 fadrozole (FAD, Sigma F3806). Fadrozole has been previously reported to effectively block  
191 aromatase activity in teleost fish and other vertebrates, including this species [36,44–46]. Before  
192 the agonistic encounter, we diluted stock fadrozole ( $10 \mu\text{g}/\mu\text{l}$ ) in PBS, and IP injected  $20 \mu\text{g/gbw}$   
193 to both individuals 1 hour prior to gate removal. Behavioral experiments were performed as  
194 described above. Control experiments in female-female dyads were carried out injecting PBS (in  
195 equivalent volume) to both contenders, one hour before the agonistic encounter. Individuals  
196 were sexed either by surgical observation 1 month prior, which has been shown has no effect  
197 upon agonistic behavior in comparison with intact dyads (FAD, control groups following [36]) or  
198 by gonadal inspection in euthanized animals after behavioral tests (CA group, euthanization by  
199 eugenol solution  $8 \text{ mg l}^{-1}$ ).

200

#### 201 Data processing

202 Locomotor and electric displays were analyzed by a researcher blind to the experimental groups  
203 and treatments. Following [34], we identified the three phases of agonistic encounters: (1)  
204 evaluation phase: from time 0 (gate removal) to the occurrence of the first attack; (2) contest  
205 phase: from the occurrence of the first attack to conflict resolution (resolution time); and (3)  
206 post-resolution phase: 10 min after conflict resolution. Conflict resolution was defined as the  
207 moment we observed the third consecutive retreat of one fish without retaliation. This criterion  
208 unambiguously defined subordinate status; fish fulfilling this requirement were never observed  
209 to change their status in the following 10 min of interaction. To calculate attack rate, we divided  
210 the number of attacks (bites, nips, nudges) [47] by contest duration time in seconds. We



211 identified previously described transient submissive electric signals: offs (EOD interruptions),  
212 chirps (abrupt increases in EOD rate) [34] and electrical submission (stable, post-resolution  
213 EOD rate rank) [48]. We calculated off and chirp rate (for contest and post-resolution phases  
214 together) by dividing the number of offs and chirps produced in both phases by the duration in  
215 sec. To calculate electrical submission, we determined mean EOD rates in dominants and  
216 subordinates during pre-contest (before gate removal) and post-resolution in 10 - 60 s  
217 recordings from both phases, using the software Clampfit (Axon, 10.0.0.61). To quantify the  
218 difference in EOD rate between contenders, we calculated the subordinate / dominant EOD rate  
219 index (S/D rate index). Index values below 1 indicate that the dominant EOD rate is higher than  
220 the subordinate EOD rate.

221

## 222 Statistics

223 To analyze the effect of cyproterone acetate on EOD waveform we used a paired t-test and  
224 compared A V4/ A V3 index in the same individual at day 0 and day 15 of treatment. As  
225 behavioral data did not fit a gaussian distribution, they were analyzed with non-parametric tests:  
226 Wilcoxon Matched-Pairs test (paired variables in the same fish or the same dyad comparing  
227 dominant and subordinate), Mann-Whitney U test (independent variables using sets of data  
228 from different fish). For this reason, results are expressed as median  $\pm$  interquartile range  
229 throughout. Chi square test 2x2 Fisher was used to compare the proportion of dyads that  
230 achieved contest resolution in control and FAD groups.

231

## 232 **Results**

233

### 234 Female-female non-breeding territorial aggression

235

236 Female-female dyads of *G. omarorum* displayed robust agonistic behavior in the neutral arena  
237 protocol (Fig. 2). All dyads engaged in agonistic interactions, and all ended in the establishment  
238 of stable dominance/subordination relationships. The larger fish became dominant in 6 out of 8  
239 contests. Agonistic encounters exhibited characteristic phases previously described for the  
240 species: (1) a short evaluation phase (first attack latency =  $34.8 \pm 8.8$  s,  $n = 8$ ); (2) a contest  
241 phase (contest duration,  $273 \pm 85.6$  s,  $n = 8$ ), and (3) a post-resolution phase (Fig. 2A). The  
242 contest phase was characterized by overt aggressive displays, higher in dominants compared to  
243 subordinates (attack rate Wilcoxon Matched-Pairs test,  $p = 0.008$ ,  $n = 8$ , Fig 2B). In addition,  
244 dominant and subordinate attacks were strongly correlated during contests ( $R^2 = 0.8$ ,  $p = 0.003$ ,  
245  $n = 8$ , data not shown). During contest and post-resolution phase subordinates emitted electric  
246 signals of submission (off rate  $0.02 \pm 0.005$ ,  $n = 8$ ; and chirp rate  $0.025 \pm 0.01$ ,  $n = 8$ , data not  
247 shown). After resolution, EOD rate rank was established, and the acquired status of dominants  
248 and subordinates did not reverse (Fig. 2C). In the pre-contest phase contenders did not differ in  
249 their basal EOD rates (median S/D rate index = 1.01) whereas after resolution dominants' EOD  
250 rates were higher than their counterpart subordinates (median S/D rate index = 0.6; pre-contest  
251 vs post-resolution S/D rate index: Wilcoxon Matched-Pairs test,  $p = 0.016$ ,  $n = 7$ , Fig. 2C).

252

### 253 Hormonal modulation of aggression: the analysis of rapid effects through acute treatments.

254 To assess rapid effects of estrogens on the expression of non-breeding female territorial  
255 aggression, we acutely treated both fish of the dyad with fadrozole, an inhibitor of the aromatase  
256 enzyme. The first and foremost effect of aromatase inhibition upon dyadic interaction was a  
257 significant decline in overall aggression. As shown in Fig. 3A, 8 out of 8 control dyads engaged  
258 in conflict in less than 28 seconds; all of them reached conflict resolution and establishment of  
259 dominant/subordinate status in less than 156 seconds. Fadrozole-treated dyads showed conflict  
260 engagement in 7 of 10 dyads, of which only 5 resolved their conflict (conflict resolution: Chi  
261 square test 2x2, Fisher exact Test,  $p=0.035$ ,  $n_{\text{FAD}} = 10$ ,  $n_{\text{CTRL}} = 8$ ). The other two dyads which

262 engaged in conflict did not achieve resolution in a 20-minute period (Fig. 3A). Of the 5 dyads  
263 which resolved the conflict, in 3 the larger contender achieved dominance. The administration of  
264 fadrozole increased the latency to the first attack in comparison to control dyads (Mann-Whitney  
265 U test,  $p = 0.014$ ,  $n_{\text{FAD}} = 7$ ,  $n_{\text{CTRL}} = 8$ ; Fig. 3B) and in the dyads in which conflict was resolved, there  
266 was a conspicuous decrease in aggression levels. The attack rates of dominants displayed  
267 during contests were significantly lower than control dyads (Mann-Whitney U test,  $p = 0.019$ ,  $n_{\text{FAD}}$   
268  $= 5$ ,  $n_{\text{CTRL}} = 8$ ; Fig. 3C), as were the attack rates of subordinate fish (Mann-Whitney U test,  $p =$   
269  $0.006$ ,  $n_{\text{FAD}} = 5$ ,  $n_{\text{CTRL}} = 8$ ; Fig. 3D). This striking overall effect upon aggression levels most  
270 probably accounts for the lower percentage of conflict resolution. However, it does not generate  
271 a significant modification in the accompanying electric social signals of submission.  
272 Subordinates of the dyads with aromatase inhibition did not differ in off rate (Mann-Whitney U  
273 test,  $p = 0.9$ ,  $n_{\text{FAD}} = 7$ ,  $n_{\text{CTRL}} = 8$ ), nor chirp rate (Mann-Whitney U test,  $p = 0.3$ ,  $n_{\text{FAD}} = 7$ ,  $n_{\text{CTRL}} = 8$ ). In  
274 addition, EOD rate rank was established in fadrozole treated dyads just as in control ones, as  
275 post-resolution S/D rate index values were lower than before the contest, reflecting a higher rate  
276 of dominants in comparison to subordinates after resolution (pre-contest vs post-resolution S/D  
277 rate index<sub>FAD</sub>: Wilcoxon Matched-Pairs test,  $p = 0.06$ ,  $n = 5$ , data not shown). Not only did the S/D  
278 rate index decrease after resolution as in controls, but the values in themselves did not differ  
279 between fadrozole and control dyads, neither during pre-contest phase (Mann-Whitney U test,  $p$   
280  $= 0.84$ ,  $n_{\text{FAD}} = 5$ ,  $n_{\text{CTRL}} = 7$ ) nor after conflict resolution (Mann-Whitney U test,  $p = 0.11$ ,  $n_{\text{FAD}} = 5$ ,  $n_{\text{CTRL}}$   
281  $= 7$ ). Fadrozole treated dyads showed no difference compared to controls in locomotor activity 1  
282 h after injection, before gate removal (Mann-Whitney U test,  $p = 0.28$ ,  $n_{\text{FAD}} = 20$ ,  $n_{\text{CTRL}} = 16$ , data  
283 not shown).

284 To analyze if, in addition to estrogenic modulation, endogenous androgens have direct rapid  
285 effects upon non-breeding aggression, we treated both contenders of a group of dyads with  
286 cyproterone acetate, an androgen receptor antagonist. Acutely blocking the androgen receptor  
287 function had no effects upon overall aggression dynamics. Neither conflict engagement, latency

288 to first attack, conflict resolution, nor aggression levels of dominant or subordinate fish showed  
289 any significant difference in comparison to control dyads (Mann-Whitney U test attack latency,  $p$   
290 = 0.56,  $n_{CA} = 7$ ,  $n_{CTRL} = 8$ ; Mann-Whitney U test dominant attack rate,  $p = 0.67$ ,  $n_{CA} = 7$ ,  $n_{CTRL} =$   
291 8; Mann-Whitney U test subordinate attack rate,  $p = 0.09$ ,  $n_{CA} = 7$ ,  $n_{CTRL} = 8$ , data not shown).  
292 Subordinates of the dyads with cyproterone acetate did not differ in off rate emission (Mann-  
293 Whitney U test,  $p = 0.45$ ,  $n_{CA} = 7$ ,  $n_{CTRL} = 8$ ), nor chirp rate (Mann-Whitney U test,  $p = 0.25$ ,  $n_{CA} =$   
294 7,  $n_{CTRL} = 8$ ). EOD rate rank was established in cyproterone acetate treated dyads as well as in  
295 control ones (pre-contest vs post-resolution S/D rate index<sub>CA</sub>: Wilcoxon Matched-Pairs test,  $p =$   
296 0.016,  $n = 7$ ). Moreover, S/D rate index did not differ between cyproterone acetate and control  
297 dyads, neither during pre-contest phase (Mann-Whitney U test,  $p = 0.38$ ,  $n_{CA} = 7$ ,  $n_{CTRL} = 7$ ) nor  
298 after conflict resolution (Mann-Whitney U test,  $p = 0.38$ ,  $n_{CA} = 7$ ,  $n_{CTRL} = 7$ ).

299

## 300 Discussion

301

302 This is the first report on the evaluation of hormonal control of non-breeding female aggression  
303 in a teleost species. We show that a. non-breeding females of *Gymnotus omarorum* display  
304 robust aggressive territorial behavior, b. this aggression depends on rapid modulation of  
305 aromatase, revealing the importance of short-term effects of estrogens, and c. androgens show  
306 no rapid modulation upon this behavior.

307

308 Territorial aggression in *G. omarorum* has previously been reported to occur both in males and  
309 females, and be sexually monomorphic [34,35]. Nevertheless, the careful analysis of female  
310 aggression separately from male aggression is imperative to approach the hormonal modulation  
311 of this behavior. Overtly similar behavior may in fact be based on sexually distinct underlying  
312 mechanisms [49]. This is the case of the similar parenting behavior in male and female prairie  
313 voles, which are underlain by sexually different vasopressin innervation in key brain areas

314 (reviewed in [49]). In the present study, female *G. omarorum* engaged, as expected, in highly  
315 aggressive and escalated contests during the non-breeding season, competing for space as a  
316 resource. After a short evaluation time, contests were initiated and resolved in less than 5  
317 minutes. The larger female won most of the fights, submission was signalled by transient social  
318 electric signals and dominance was displayed by actively excluding the subordinate fish from  
319 the acquired territory while establishing an EOD rate rank, as has previously been reported  
320 [34,48,50]. Non-breeding territorial behavior in *G. omarorum* is extremely robust and maintains  
321 its features and overall dynamics independently of sex, across controls of many experimental  
322 approaches and in surgically sexed animals [33,34,36,48,50,51]. Lab results showing no sexual  
323 differences in non-breeding territorial aggression complement the data on spacing of this  
324 species in the wild, in which males and females own same-sized territories [32]. Non-breeding  
325 territorial aggression may be related to the defense of foraging patches since electrogeneration  
326 has been reported to impose high basal metabolic requirements [52]. Weakly electric fish  
327 continuously discharge EODs throughout their life and EOD amplitude is known to be strongly  
328 correlated with fish size in *G. omarorum* [53] and other electric fish [54–56]. Larger fish not only  
329 hold larger territories in the wild, regardless of sex [32], but also have a higher chance of  
330 winning a contest ([34], this study).

331

332 Non-breeding aggression in birds and mammals has been reported to be mediated by  
333 circulating precursors which are converted into active sex steroids (androgens and estrogens)  
334 within the brain (reviewed in [12]). As an exploratory step in evaluating the role of sex steroids in  
335 non-breeding female aggression in *G. omarorum*, we pharmacologically manipulated the  
336 androgenic pathway. Rapid, nongenomic actions of androgens have been reported to occur in  
337 various tissues, including the brain, mediated by androgen receptors [57–59]. Cyproterone  
338 acetate is an antagonist of androgen receptors, including those mediating fast nongenomic  
339 actions [60] and was effective in *G. omarorum* as it blocked an androgen-induced change in

340 EOD waveform (Fig. 1). Short-term blocking of androgen receptors, however, showed no  
341 influence upon non-breeding aggression dynamics nor the establishment of  
342 dominant/subordinate status. These results suggest that if androgens are directly involved at all  
343 in sustaining aggression during the non-breeding season in females, their action may be  
344 through genomic mechanisms, and thus be evinced in a longer time frame. In male *G.*  
345 *omarorum*, non-breeding aggression remains unchanged under long term elimination of gonadal  
346 hormones, ruling out their role as modulators [36]. In the year-round territorial fish *Stegastes*  
347 *nigricans*, non-breeding circulating androgens are low, and remain so in both sexes after an  
348 aggressive encounter, although long term androgen receptor blocking decreases aggression in  
349 males but not females [17,61]. We have yet to explore if long-term direct effects of androgens,  
350 regardless of their source, occur in male and female non-breeding aggression in *G. omarorum*.

351  
352 Estrogens have been put forth as key elements in models of non-breeding aggression. Pioneer  
353 studies in birds show long-lasting aromatase inhibition reduces aggression which can be  
354 recovered by estradiol treatment [24,62]. We focused on the role of this steroidal pathway in the  
355 non-breeding aggression of female *G. omarorum* using acute aromatase inhibition and showed  
356 an important role of estrogens. There was an overall decrease in motivation to display  
357 aggression, revealed both by an important delay in initiating overt aggression and a significant  
358 decrease in dyads which reached conflict resolution (Fig. 3). These results were strikingly  
359 similar to what has been reported for male *G. omarorum*, in which potential winners failed to  
360 either resolve contests or achieve dominance when acutely treated with an aromatase inhibitor  
361 [36]. Interestingly, in spite of affecting the intensity of aggressive interactions, aromatase  
362 inhibition did not affect electric signalling, which suggests that the electrogeneration system is  
363 not sensitive to rapid estrogen effects *per se*. Our results, taken together with reports of  
364 estrogenic modulation of male aggression [36] support estrogen as a key modulator of non-  
365 breeding aggression, acting through rapid mechanisms in this species. Estrogen, most probably

366 brain derived, has been reported to have rapid effects underlying non-breeding aggression in  
367 birds and mammals [18,19,23,24,63,64]. The magnitude of these rapid effects upon behavior  
368 have been shown to depend on estrogen sensitivity i.e. higher estrogen receptor expression, in  
369 key brain regions [21]. It is interesting to focus on how female aggression can bring novel and  
370 sexually distinct mechanisms into consideration. Rapid effects of estrogens have been reported  
371 to be more pronounced in female than male brains in zebra finch [13]. Non-breeding female  
372 Siberian hamsters, which display robust aggression, have very low circulating estrogen levels  
373 which are offset by a seasonal increase in estrogen sensitivity in brain areas associated with  
374 aggressive behavior [63]. Teleost fish, which have exceptionally high aromatase activity that  
375 shows both seasonal plasticity and sexual differences (reviewed in [65]) emerge as an  
376 advantageous model for this approach.

377

### 378 **Concluding remarks**

379 In this study we show for the first time in a female teleost that non-breeding aggression depends  
380 on estrogen production. Females of *Gymnotus omarorum* rely on short term estrogen synthesis  
381 to engage in territorial aggression, maintain high levels of aggression, and ultimately reach  
382 conflict resolution from which dominant/subordinate status emerges. Our results highlight the  
383 importance of fast acting estrogens in the control of non-breeding female aggression in *G.*  
384 *omarorum* which taken together with our reports from males of this species, as well as  
385 contributions from bird and mammal models point to conserved strategies across species.  
386 Further analysis of female non-breeding aggression may shed light on potential sexual  
387 differences in the fine tuning of social behaviors.

388

### 389 **Acknowledgements**

390 We are very grateful to Cecilia Jalabert for her revision and helpful suggestions to our  
391 manuscript, and Rossana Perrone for her generous advice on behavioral processing and



392 statistics. We would like to thank to Agencia Nacional de Investigación e Innovación (ANII),  
393 Programa de Desarrollo de las Ciencias Básicas (PEDECIBA), and Universidad de la  
394 República, Uruguay for funding.

395 Specific grants that funded this research: ANII\_FCE\_6180, ANII\_FCE\_136381, FCE\_4272.

396

## 397 **References**

- 398 [1] N. Duque-Wilckens, B.C. Trainor, Behavioral Neuroendocrinology of Female Aggression, Oxford  
399 University Press, 2017.  
400 [https://oxfordre.com/neuroscience/view/10.1093/acrefore/9780190264086.001.0001/acrefore-](https://oxfordre.com/neuroscience/view/10.1093/acrefore/9780190264086.001.0001/acrefore-9780190264086-e-11)  
401 [9780190264086-e-11](https://oxfordre.com/neuroscience/view/10.1093/acrefore/9780190264086.001.0001/acrefore-9780190264086-e-11).
- 402 [2] N.G. Simon, S.-F. Lu, Androgens and aggression, in: Biology of Aggression, Oxford University Press,  
403 USA, 2006: pp. 211–230.
- 404 [3] B.A. Schlinger, G.V. Callard, Aromatization mediates aggressive behavior in quail, General and  
405 Comparative Endocrinology. 79 (1990) 39–53. [https://doi.org/10.1016/0016-6480\(90\)90086-2](https://doi.org/10.1016/0016-6480(90)90086-2).
- 406 [4] J. Balthazart, B. Ball, Brain aromatase, estrogens, and behavior., Oxford University Press., 2012.
- 407 [5] E. Adkins-Regan, Hormones and Animal Social Behavior, Princeton University Press, 2005.
- 408 [6] S.C.P. Renn, E.J. Fraser, N. Aubin-Horth, B.C. Trainor, H.A. Hofmann, Females of an African cichlid  
409 fish display male-typical social dominance behavior and elevated androgens in the absence of  
410 males, Hormones and Behavior. 61 (2012) 496–503. <https://doi.org/10.1016/j.yhbeh.2012.01.006>.
- 411 [7] K.A. Rosvall, Intrasexual competition in females: evidence for sexual selection?, Behavioral Ecology.  
412 22 (2011) 1131–1140. <https://doi.org/10.1093/beheco/arr106>.
- 413 [8] K.A. Rosvall, C.M. Bergeon Burns, J. Barske, J.L. Goodson, B.A. Schlinger, D.R. Sengelaub, E.D.  
414 Ketterson, Neural sensitivity to sex steroids predicts individual differences in aggression:  
415 implications for behavioural evolution, Proceedings of the Royal Society B: Biological Sciences. 279  
416 (2012) 3547–3555. <https://doi.org/10.1098/rspb.2012.0442>.
- 417 [9] D.R. Rubenstein, M. Wikelski, Steroid hormones and aggression in female Galápagos marine  
418 iguanas, Hormones and Behavior. 48 (2005) 329–341. <https://doi.org/10.1016/j.yhbeh.2005.04.006>.
- 419 [10] M.F. Scaia, L. Morandini, C. Noguera, V.L. Trudeau, G.M. Somoza, M. Pandolfi, Can estrogens be  
420 considered as key elements of the challenge hypothesis? The case of intrasexual aggression in a  
421 cichlid fish, Physiology & Behavior. 194 (2018) 481–490.  
422 <https://doi.org/10.1016/j.physbeh.2018.06.028>.
- 423 [11] K.A. Rosvall, A.B. Bentz, E.M. George, How research on female vertebrates contributes to an  
424 expanded challenge hypothesis, Hormones and Behavior. (2019) 104565.  
425 <https://doi.org/10.1016/j.yhbeh.2019.104565>.
- 426 [12] K.K. Soma, N.M. Rendon, R. Boonstra, H.E. Albers, G.E. Demas, DHEA effects on brain and behavior:  
427 Insights from comparative studies of aggression, The Journal of Steroid Biochemistry and Molecular  
428 Biology. 145 (2015) 261–272. <https://doi.org/10.1016/j.jsbmb.2014.05.011>.
- 429 [13] K.K. Soma, M.-A.L. Scotti, A.E.M. Newman, T.D. Charlier, G.E. Demas, Novel mechanisms for  
430 neuroendocrine regulation of aggression, Frontiers in Neuroendocrinology. 29 (2008) 476–489.  
431 <https://doi.org/10.1016/j.yfrne.2007.12.003>.



- 432 [14] S.K. Woodley, M.C. Moore, Ovarian Hormones Influence Territorial Aggression in Free-Living Female  
433 Mountain Spiny Lizards, *Hormones and Behavior*. 35 (1999) 205–214.  
434 <https://doi.org/10.1006/hbeh.1999.1514>.
- 435 [15] A.E. Clipperton Allen, C.L. Cragg, A.J. Wood, D.W. Pfaff, E. Choleris, Agonistic behavior in males and  
436 females: Effects of an estrogen receptor beta agonist in gonadectomized and gonadally intact mice,  
437 *Psychoneuroendocrinology*. 35 (2010) 1008–1022. <https://doi.org/10.1016/j.psyneuen.2010.01.002>.
- 438 [16] A.E. Clipperton-Allen, A. Almey, A. Melicherik, C.P. Allen, E. Choleris, Effects of an estrogen  
439 receptor alpha agonist on agonistic behaviour in intact and gonadectomized male and female mice,  
440 *Psychoneuroendocrinology*. 36 (2011) 981–995. <https://doi.org/10.1016/j.psyneuen.2010.12.010>.
- 441 [17] P. Vulllioud, R. Bshary, A.F.H. Ros, Intra- and interspecific aggression do not modulate androgen  
442 levels in dusky gregories, yet male aggression is reduced by an androgen blocker, *Hormones and*  
443 *Behavior*. 64 (2013) 430–438. <https://doi.org/10.1016/j.yhbeh.2013.06.007>.
- 444 [18] B.C. Trainor, S. Lin, M.S. Finy\*, M.R. Rowland, R.J. Nelson, Photoperiod reverses the effects of  
445 estrogens on male aggression via genomic and nongenomic pathways, *Proc Natl Acad Sci USA*. 104  
446 (2007) 9840. <https://doi.org/10.1073/pnas.0701819104>.
- 447 [19] B.C. Trainor, M. Sima Finy, R.J. Nelson, Rapid effects of estradiol on male aggression depend on  
448 photoperiod in reproductively non-responsive mice, *Hormones and Behavior*. 53 (2008) 192–199.  
449 <https://doi.org/10.1016/j.yhbeh.2007.09.016>.
- 450 [20] S.A. Heimovics, B.C. Trainor, K.K. Soma, Rapid Effects of Estradiol on Aggression in Birds and Mice:  
451 The Fast and the Furious, *Integrative and Comparative Biology*. 55 (2015) 281–293.  
452 <https://doi.org/10.1093/icb/icv048>.
- 453 [21] J.R. Merritt, M.T. Davis, C. Jalabert, T.J. Libecap, D.R. Williams, K.K. Soma, D.L. Maney, Rapid effects  
454 of estradiol on aggression depend on genotype in a species with an estrogen receptor  
455 polymorphism, *Horm Behav*. 98 (2018) 210–218. <https://doi.org/10.1016/j.yhbeh.2017.11.014>.
- 456 [22] S.A. Laredo, R. Villalon Landeros, J.C. Dooley, M.Q. Steinman, V. Orr, A.L. Silva, K.K. Crean, C.F.  
457 Robles, B.C. Trainor, Nongenomic effects of estradiol on aggression under short day photoperiods,  
458 *Hormones and Behavior*. 64 (2013) 557–565. <https://doi.org/10.1016/j.yhbeh.2013.06.002>.
- 459 [23] S.A. Heimovics, J.K. Ferris, K.K. Soma, Non-invasive administration of 17 $\beta$ -estradiol rapidly increases  
460 aggressive behavior in non-breeding, but not breeding, male song sparrows, *Hormones and*  
461 *Behavior*. 69 (2015) 31–38. <https://doi.org/10.1016/j.yhbeh.2014.11.012>.
- 462 [24] K.K. Soma, A.D. Tramontin, J.C. Wingfield, Oestrogen regulates male aggression in the non-breeding  
463 season, *Proceedings of the Royal Society of London. Series B: Biological Sciences*. 267 (2000) 1089–  
464 1096. <https://doi.org/10.1098/rspb.2000.1113>.
- 465 [25] T.D. Charlier, A.E.M. Newman, S.A. Heimovics, K.W.L. Po, C.J. Saldanha, K.K. Soma, Rapid Effects of  
466 Aggressive Interactions on Aromatase Activity and Oestradiol in Discrete Brain Regions of Wild Male  
467 White-Crowned Sparrows, *Journal of Neuroendocrinology*. 23 (2011) 742–753.  
468 <https://doi.org/10.1111/j.1365-2826.2011.02170.x>.
- 469 [26] N.M. Rendon, G.E. Demas, Bi-directional actions of dehydroepiandrosterone and aggression in  
470 female Siberian hamsters, *Journal of Experimental Zoology Part A: Ecological Genetics and*  
471 *Physiology*. 325 (2016) 116–121. <https://doi.org/10.1002/jez.2001>.
- 472 [27] G.E. Demas, M.A. Cooper, H.E. Albers, K.K. Soma, Novel Mechanisms Underlying Neuroendocrine  
473 Regulation of Aggression: A Synthesis of Rodent, Avian, and Primate Studies, in: A. Lajtha, J.D.  
474 Blaustein (Eds.), *Handbook of Neurochemistry and Molecular Neurobiology*, Springer US, Boston,  
475 MA, 2007: pp. 337–372. [https://doi.org/10.1007/978-0-387-30405-2\\_8](https://doi.org/10.1007/978-0-387-30405-2_8).
- 476 [28] K.K. Soma, J.C. Wingfield, Dehydroepiandrosterone in Songbird Plasma: Seasonal Regulation and  
477 Relationship to Territorial Aggression, *General and Comparative Endocrinology*. 123 (2001) 144–  
478 155. <https://doi.org/10.1006/gcen.2001.7657>.

- 479 [29] M. Hau, S.T. Stoddard, K.K. Soma, Territorial aggression and hormones during the non-breeding  
480 season in a tropical bird, *Hormones and Behavior*. 45 (2004) 40–49.  
481 <https://doi.org/10.1016/j.yhbeh.2003.08.002>.
- 482 [30] Kazuyoshi Tsutsui, Takeshi Yamazaki, Avian neurosteroids. I. Pregnenolone biosynthesis in the quail  
483 brain, *Brain Research*. 678 (1995) 1–9. [https://doi.org/10.1016/0006-8993\(95\)00116-8](https://doi.org/10.1016/0006-8993(95)00116-8).
- 484 [31] K. Tsutsui, M. Matsunaga, H. Miyabara, K. Ukena, Neurosteroid biosynthesis in the quail brain: a  
485 review, *Journal of Experimental Zoology Part A: Comparative Experimental Biology*. 305A (2006)  
486 733–742. <https://doi.org/10.1002/jez.a.302>.
- 487 [32] L. Zubizarreta, L. Quintana, D. Hernández, F.T. de Mello, M. Meerhoff, R.M. Honji, R.G. Moreira, A.C.  
488 Silva, Seasonal and social factors associated with spacing in a wild territorial electric fish, *BioRxiv*.  
489 (2020) 2020.01.29.924761. <https://doi.org/10.1101/2020.01.29.924761>.
- 490 [33] R. Perrone, F. Pedraja, G. Valiño, B. Tassino, A. Silva, Non-breeding territoriality and the effect of  
491 territory size on aggression in the weakly electric fish, *Gymnotus omarorum*, *Acta Ethol*. 22 (2019)  
492 79–89. <https://doi.org/10.1007/s10211-019-00309-7>.
- 493 [34] G. Batista, L. Zubizarreta, R. Perrone, A. Silva, Non-sex-biased dominance in a sexually monomorphic  
494 electric fish: fight structure and submissive electric signalling, *Ethology*. 118 (2012) 398–410.  
495 <https://doi.org/10.1111/j.1439-0310.2012.02022.x>.
- 496 [35] L. Quintana, L. Zubizarreta, C. Jalabert, G. Batista, R. Perrone, A. Silva, Building the case for a novel  
497 teleost model of non-breeding aggression and its neuroendocrine control, *Journal of Physiology-*  
498 *Paris*. 110 (2016) 224–232. <https://doi.org/10.1016/j.jphysparis.2016.11.009>.
- 499 [36] C. Jalabert, L. Quintana, P. Pessina, A. Silva, Extra-gonadal steroids modulate non-breeding  
500 territorial aggression in weakly electric fish, *Hormones and Behavior*. 72 (2015) 60–67.  
501 <https://doi.org/10.1016/j.yhbeh.2015.05.003>.
- 502 [37] A. Silva, L. Quintana, M. Galeano, P. Errandonea, Biogeography and Breeding in Gymnotiformes  
503 from Uruguay, *Environmental Biology of Fishes*. 66 (2003) 329–338.  
504 <https://doi.org/10.1023/A:1023986600069>.
- 505 [38] A. Silva, R. Perrone, O. Macadar, Environmental, seasonal, and social modulations of basal activity in  
506 a weakly electric fish, *Physiology & Behavior*. 90 (2007) 525–536.  
507 <https://doi.org/10.1016/j.physbeh.2006.11.003>.
- 508 [39] L. Ramage-Healey, A.H. Bass, Rapid, Hierarchical Modulation of Vocal Patterning by Steroid  
509 Hormones, *J. Neurosci*. 24 (2004) 5892. <https://doi.org/10.1523/JNEUROSCI.1220-04.2004>.
- 510 [40] C.J. Dey, C.M. O'Connor, K.M. Gilmour, G. Van Der Kraak, S.J. Cooke, Behavioral and physiological  
511 responses of a wild teleost fish to cortisol and androgen manipulation during parental care,  
512 *Hormones and Behavior*. 58 (2010) 599–605. <https://doi.org/10.1016/j.yhbeh.2010.06.016>.
- 513 [41] J.L. Ardanaz, A. Silva, O. Macadar, Temperature sensitivity of the electric organ discharge waveform  
514 in *Gymnotus carapo*, *Journal of Comparative Physiology A*. 187 (2001) 853–864.  
515 <https://doi.org/10.1007/s00359-001-0256-8>.
- 516 [42] O. Trujillo-Cenóz, J.A. Echagüe, O. Macadar, Innervation pattern and electric organ discharge  
517 waveform in *Gymnotus carapo* (Teleostei; Gymnotiformes), *Journal of Neurobiology*. 15 (1984) 273–  
518 281. <https://doi.org/10.1002/neu.480150404>.
- 519 [43] P. Pouso, L. Quintana, C. Bolatto, A.C. Silva, Brain androgen receptor expression correlates with  
520 seasonal changes in the behavior of a weakly electric fish, *Brachyhyppomus gauderio*, *Hormones*  
521 *and Behavior*. 58 (2010) 729–736. <https://doi.org/10.1016/j.yhbeh.2010.07.005>.
- 522 [44] D. Gonçalves, J. Alpedrinha, M. Teles, R.F. Oliveira, Endocrine control of sexual behavior in sneaker  
523 males of the peacock blenny *Salarias pavo*: Effects of castration, aromatase inhibition, testosterone  
524 and estradiol, *Hormones and Behavior*. 51 (2007) 534–541.  
525 <https://doi.org/10.1016/j.yhbeh.2007.02.003>.

- 526 [45] L.S. Huffman, L.A. O'Connell, H.A. Hofmann, Aromatase regulates aggression in the African cichlid  
527 fish *Astatotilapia burtoni*, *Physiology & Behavior*. 112–113 (2013) 77–83.  
528 <https://doi.org/10.1016/j.physbeh.2013.02.004>.
- 529 [46] J. Wade, B.A. Schlinger, L. Hodges, A.P. Arnold, Fadrozole: A Potent and Specific Inhibitor of  
530 Aromatase in the Zebra Finch Brain, *General and Comparative Endocrinology*. 94 (1994) 53–61.  
531 <https://doi.org/10.1006/gcen.1994.1059>.
- 532 [47] P. Black-Cleworth, The Role of Electrical Discharges in the Non-Reproductive Social Behaviour of  
533 *Gymnotus carapo* (Gymnotidae, Pisces), *Animal Behaviour Monographs*. 3 (1970) 1-IN1.  
534 [https://doi.org/10.1016/S0066-1856\(70\)80001-2](https://doi.org/10.1016/S0066-1856(70)80001-2).
- 535 [48] R. Perrone, A.C. Silva, Status-Dependent Vasotocin Modulation of Dominance and Subordination in  
536 the Weakly Electric Fish *Gymnotus omarorum*, *Frontiers in Behavioral Neuroscience*. 12 (2018) 1.  
537 <https://doi.org/10.3389/fnbeh.2018.00001>.
- 538 [49] G.J. De Vries, Minireview: Sex Differences in Adult and Developing Brains: Compensation,  
539 Compensation, Compensation, *Endocrinology*. 145 (2004) 1063–1068.  
540 <https://doi.org/10.1210/en.2003-1504>.
- 541 [50] L. Zubizarreta, P.K. Stoddard, A. Silva, Aggression Levels Affect Social Interaction in the Non-  
542 Breeding Territorial Aggression of the Weakly Electric Fish, *Gymnotus omarorum*, *Ethology*. 121  
543 (2015) 8–16. <https://doi.org/10.1111/eth.12299>.
- 544 [51] V. Comas, K. Langevin, A. Silva, M. Borde, Distinctive mechanisms underlie the emission of social  
545 electric signals of submission in *Gymnotus omarorum*, *J. Exp. Biol.* 222 (2019)  
546 jeb195354. <https://doi.org/10.1242/jeb.195354>.
- 547 [52] M.R. Markham, Y. Ban, A.G. McCauley, R. Maltby, Energetics of Sensing and Communication in  
548 Electric Fish: A Blessing and a Curse in the Anthropocene?, *Integr. Comp. Biol.* 56 (2016) 889–900.  
549 <https://doi.org/10.1093/icb/icw104>.
- 550 [53] A. Caputi, R. Budelli, The electric image in weakly electric fish: I. A data-based model of waveform  
551 generation in *Gymnotus carapo*, *Journal of Computational Neuroscience*. 2 (1995) 131–147.  
552 <https://doi.org/10.1007/BF00961884>.
- 553 [54] G.W. Max Westby, F. Kirschbaum, SEX DIFFERENCES IN THE ELECTRIC ORGAN DISCHARGE OF  
554 *EIGENMANNIA VIRESCENS* AND THE EFFECT OF GONADAL MATURATION, in: T. Szabó, G. Czéh (Eds.),  
555 *Sensory Physiology of Aquatic Lower Vertebrates*, Pergamon, 1981: pp. 179–194.  
556 <https://doi.org/10.1016/B978-0-08-027352-5.50017-3>.
- 557 [55] C.D. Hopkins, Sex Differences in Electric Signaling in an Electric Fish, *Science*. 176 (1972) 1035.  
558 <https://doi.org/10.1126/science.176.4038.1035>.
- 559 [56] M. Hagedorn, Ecology and Behavior of a Pulse-Type Electric Fish, *Hypopomus occidentalis*  
560 (Gymnotiformes, Hypopomidae), in a Fresh-Water Stream in Panama, *Copeia*. 1988 (1988) 324–335.  
561 <https://doi.org/10.2307/1445872>.
- 562 [57] M. Soma, J. Kim, A. Kato, S. Kawato, Src Kinase Dependent Rapid Non-genomic Modulation of  
563 Hippocampal Spinogenesis Induced by Androgen and Estrogen, *Frontiers in Neuroscience*. 12 (2018)  
564 282. <https://doi.org/10.3389/fnins.2018.00282>.
- 565 [58] R.A. Davey, M. Grossmann, Androgen Receptor Structure, Function and Biology: From Bench to  
566 Bedside, *Clin Biochem Rev.* 37 (2016) 3–15.
- 567 [59] B.S. McEwen, T.A. Milner, Understanding the broad influence of sex hormones and sex differences  
568 in the brain, *Journal of Neuroscience Research*. 95 (2017) 24–39. <https://doi.org/10.1002/jnr.23809>.
- 569 [60] S.B. Kim, A. Kanno, T. Ozawa, H. Tao, Y. Umezawa, Nongenomic Activity of Ligands in the Association  
570 of Androgen Receptor with Src, *ACS Chem. Biol.* 2 (2007) 484–492.  
571 <https://doi.org/10.1021/cb7000439>.

- 572 [61] A.F.H. Ros, P. Vulllioud, R. Bruintjes, A. Vallat, R. Bshary, Intra- and interspecific challenges modulate  
573 cortisol but not androgen levels in a year-round territorial damselfish, *J. Exp. Biol.* 217 (2014) 1768.  
574 <https://doi.org/10.1242/jeb.093666>.
- 575 [62] K.K. Soma, K. Sullivan, J. Wingfield, Combined Aromatase Inhibitor and Antiandrogen Treatment  
576 Decreases Territorial Aggression in a Wild Songbird during the Nonbreeding Season, *General and*  
577 *Comparative Endocrinology*. 115 (1999) 442–453. <https://doi.org/10.1006/gcen.1999.7334>.
- 578 [63] N.M. Rendon, A.C. Améz, M.R. Proffitt, E.R. Bauserman, G.E. Demas, Aggressive behaviours track  
579 transitions in seasonal phenotypes of female Siberian hamsters, *Functional Ecology*. 31 (2017)  
580 1071–1081. <https://doi.org/10.1111/1365-2435.12816>.
- 581 [64] K.M. Munley, N.M. Rendon, G.E. Demas, Neural Androgen Synthesis and Aggression: Insights From a  
582 Seasonally Breeding Rodent, *Front. Endocrinol.* 9 (2018).  
583 <https://doi.org/10.3389/fendo.2018.00136>.
- 584 [65] N. Diotel, Y.L. Page, K. Mouriec, S.-K. Tong, E. Pellegrini, C. Vaillant, I. Anglade, F. Brion, F. Pakdel, B.  
585 Chung, O. Kah, Aromatase in the brain of teleost fish: Expression, regulation and putative functions,  
586 *Frontiers in Neuroendocrinology*. 31 (2010) 172–192. <https://doi.org/10.1016/j.yfrne.2010.01.003>.  
587

## 588 **Figure Legends**

589

### 590 **Figure 1**

591 Test of effectiveness of cyproterone acetate (CA) in *Gymnotus omarorum*. **A.** Animals implanted  
592 with testosterone (T) and subjected to a daily IP injection of mineral oil (n=12) for 15 days  
593 changed their EOD waveform as expected [41], increasing the amplitude of the V4 component  
594 in comparison to day 1, shown as a significant increase of the index V4 amplitude / V3  
595 amplitude (AV4/AV3) (paired t-test,  $p = 0.006$ ,  $n = 12$ ). **B.** Animals implanted with T and  
596 subjected to a daily IP injection of CA for 15 days (n=10) showed no significant differences in V4  
597 amplitude (paired t-test,  $p = 0.8$ ,  $n = 10$ ).

598

### 599 **Figure 2**

600 Female non-breeding aggression characterization. **A.** Female dyadic encounters displayed the  
601 three typical phases of agonistic behavior. Submission signals began during the contest phase

602 and continued into post-resolution (n=8 control dyads). **B.** Individuals which achieved  
603 dominance showed higher aggression levels than their counterparts during conflict (attack rate  
604 Wilcoxon Matched-Pairs test,  $p = 0.008$ ,  $n = 8$ ). **C.** Dominant and subordinate status was  
605 expressed by post contest EOD rate. Rates were compared by the subordinate / dominant EOD  
606 rate index (S/D rate index). Index values were near 1 before contests and significantly lower  
607 after conflict resolution (pre-contest vs post-resolution S/D rate index: Wilcoxon Matched-Pairs  
608 test,  $p = 0.016$ ,  $n = 7$ ).

609 Figure 3

610 Effects of acute inhibition of aromatase on female non-breeding aggression. **A.** Fadrozole  
611 treated dyads engaged less in conflict than control dyads and only 5 dyads reached conflict  
612 resolution and established dominant/subordinate status (Chi square test 2x2, Fisher exact Test,  
613  $p=0.035$ ,  $n_{\text{FAD}} = 10$ ,  $n_{\text{CTRL}} = 8$ ). **B.** The latency to first attack in FAD treated dyads was significantly  
614 lower than in control dyads (Mann-Whitney U test,  $p = 0.014$ ,  $n_{\text{FAD}} = 7$ ,  $n_{\text{CTRL}} = 8$ ). **C.** Individuals  
615 which achieved dominance displayed lower attack rates during contests in FAD treated dyads  
616 compared to control dyads (Mann-Whitney U test,  $p = 0.019$ ,  $n_{\text{FAD}} = 5$ ,  $n_{\text{CTRL}} = 8$ ) **D.** Subordinates  
617 showed lower attack rates in FAD treated dyads in comparison to controls (Mann-Whitney U  
618 test,  $p = 0.006$ ,  $n_{\text{FAD}} = 5$ ,  $n_{\text{CTRL}} = 8$ ).

619

620

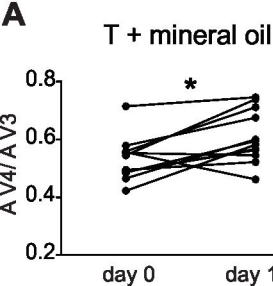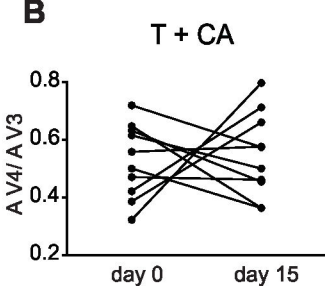

**A**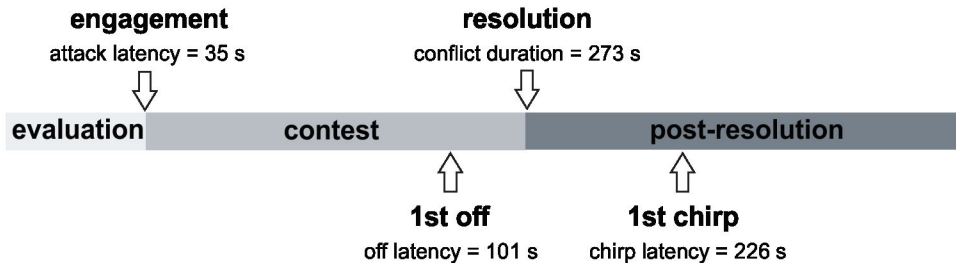**B**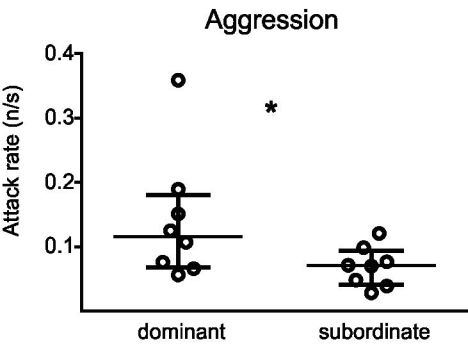**C**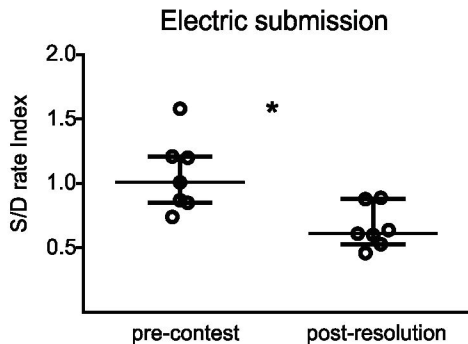

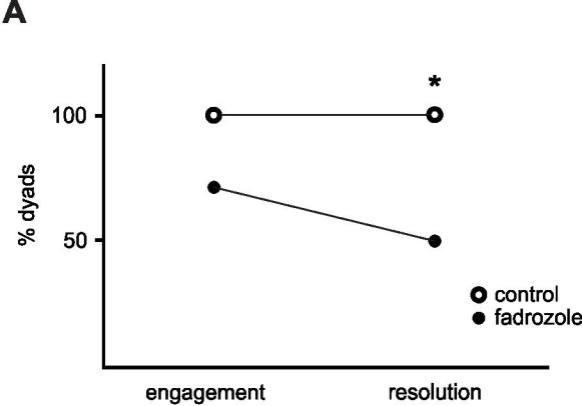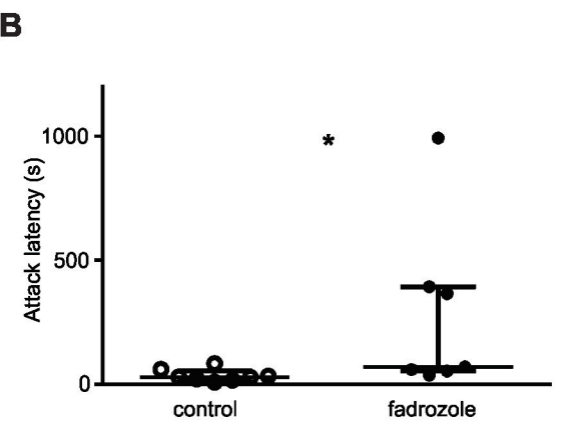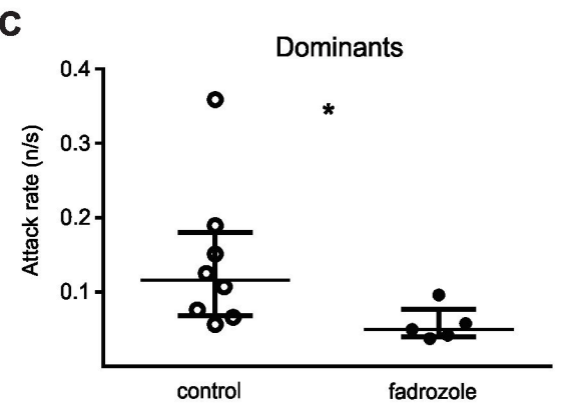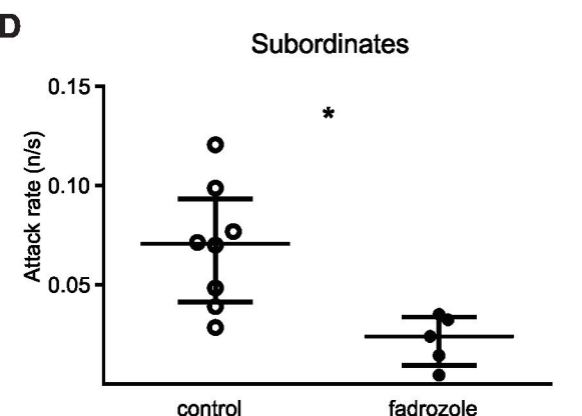

Source: https://www.biorxiv.org/content/10.1101/2020.02.12.946327v1.full.pdf
